# Supplementary material for: Amino Acids 563–566 of the Na+/H+ Exchanger Isoform 1 C-Terminal Cytosolic Tail Prevent Protein Degradation and Stabilize Protein Expression and Activity
Source: MDPI journal article supplement (doi:10.3390/ijms21051737), 2020-03-03
Supplement: s1 [file s1]

Supplementary Figures

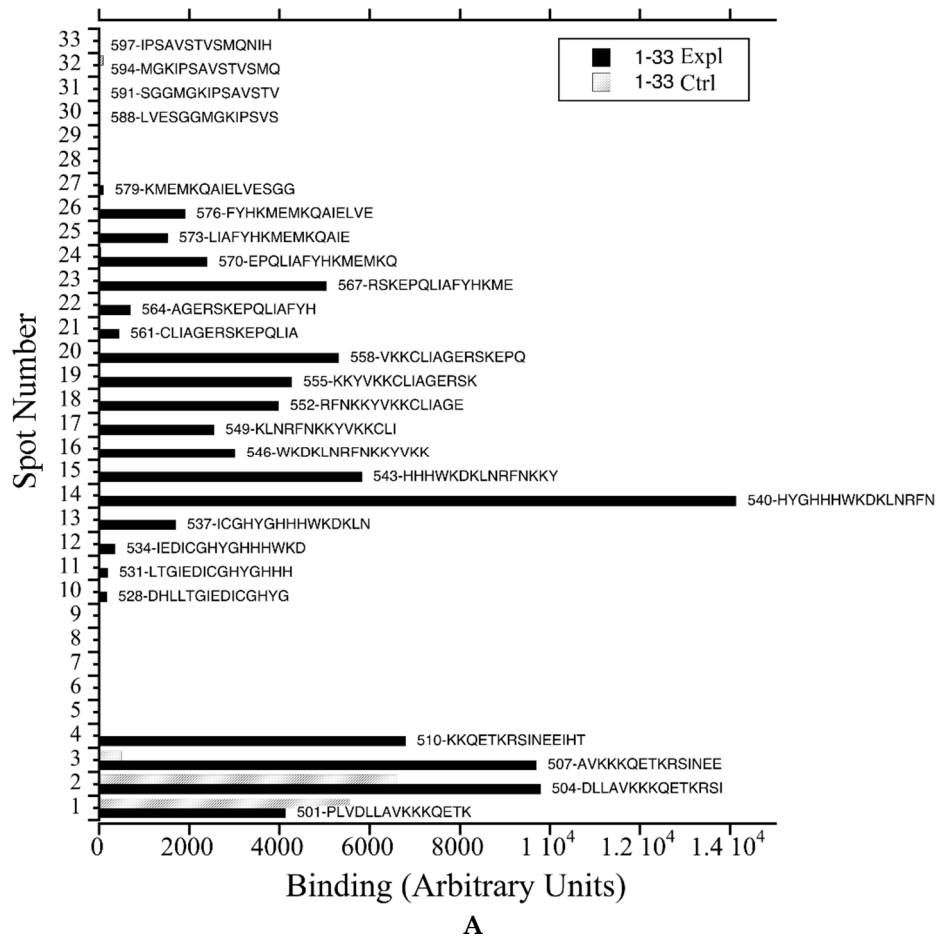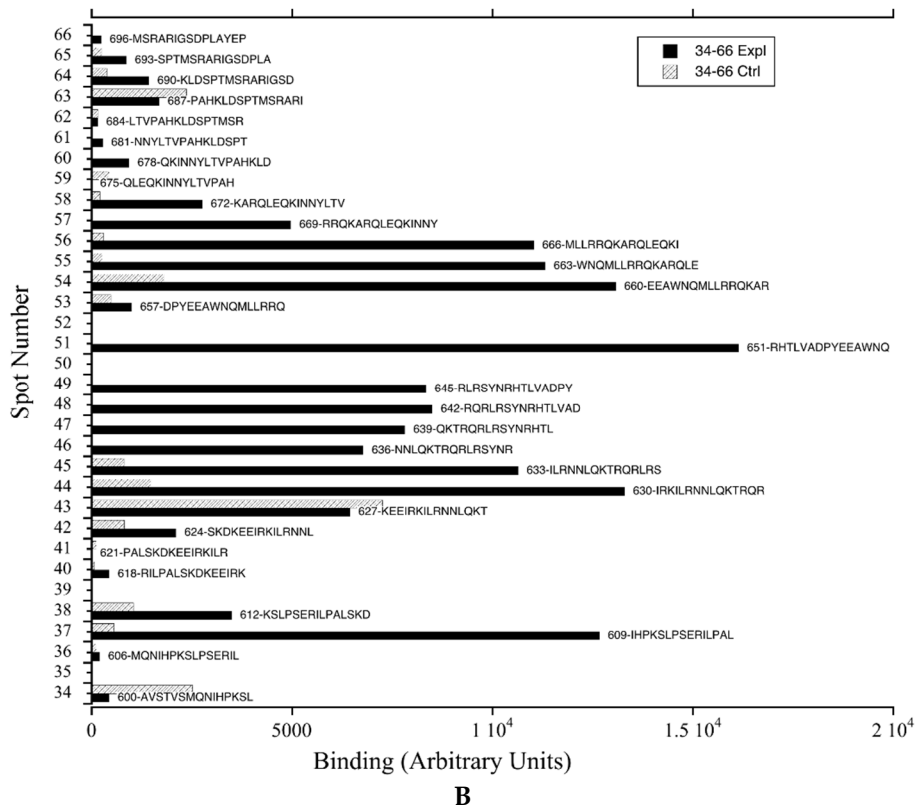

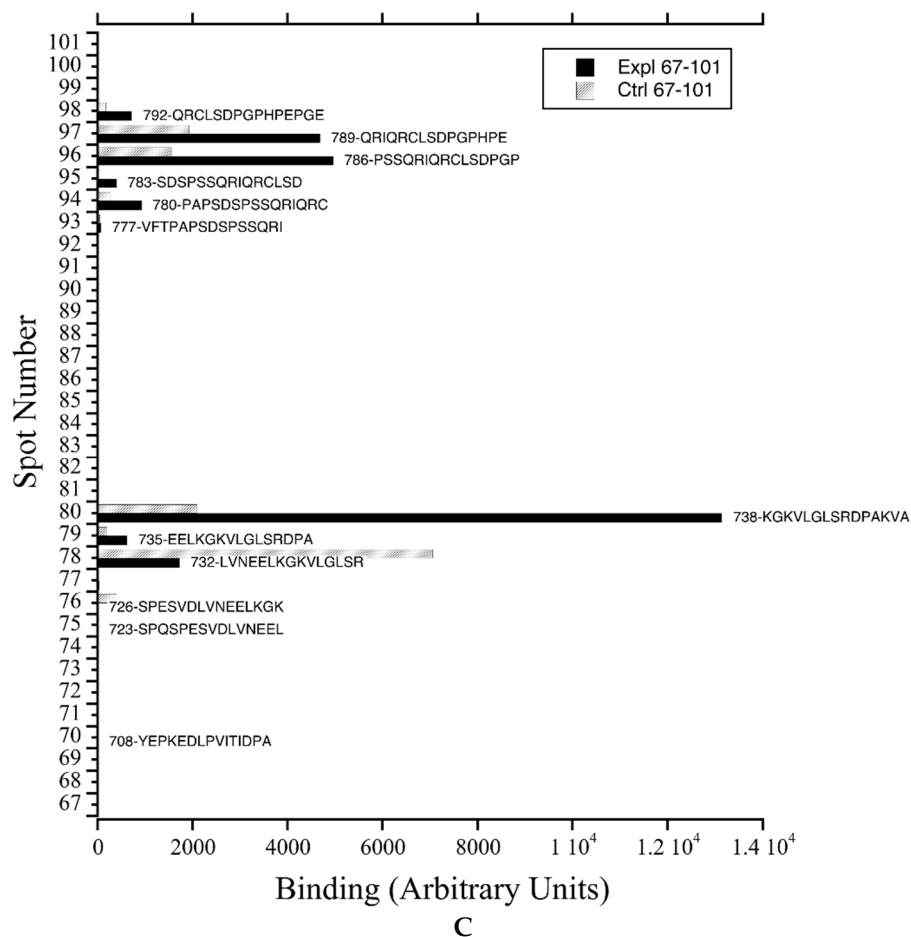

**Figure 1.** Binding of synthetic peptide containing the N-GLIAGERSYPYDVPDYAG (experimental) sequence or the peptide N-GLAAAARSYPYDVPDYAG (control). Quantification was using Image J. Results are the mean of at least 4 determinations. (A) Binding to the peptides of the dot blot numbers 1–33 beginning at amino acid 501. Each spot on the array contains a peptide of 15 amino acids in length. The adjacent peptide is shifted by 3 amino acids towards the C-terminal. Experimental, filled bars, Control, hatched bar. Sequences of the peptide array which bound to the probe are indicated. (B,C) as in A but with dot blot numbers 34–66 and 67–101 respectively.

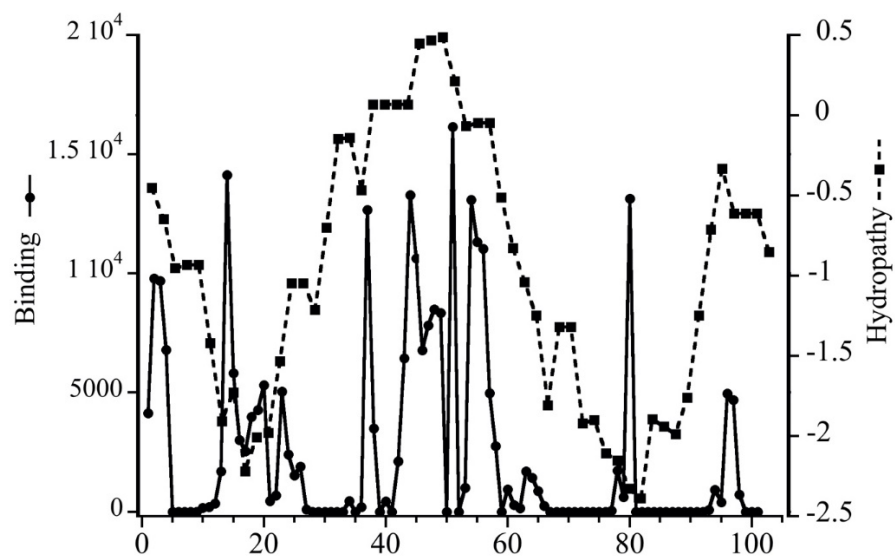

**Figure 2.** Binding of synthetic peptides (as in Figure S1) in comparison with hydropathy. Hydropathy was determined using the ExPASy Protein server, Kyte and Doolittle analysis with a window size of 15.
